# Supplementary material
Source: Elsevier journal article supplement (https://www.sciencedirect.com/science/article/pii/S0213911119301190)
Supplement: mmc1 [file S0213911119301190:mmc1.docx]

**Apéndice**

**Hitos internacionales por el desarrollo humano y la igualdad de género**

**1967-1976**🡪1975. [I Conferencia Mundial sobre la Mujer](http://www.un.org/womenwatch/daw/beijing/mexico.html). México

**1977-1986**🡪 1979. [Convención para la Eliminación de todas las Formas de Discriminación contra las Mujeres [CEDAW]](https://www.ohchr.org/sp/professionalinterest/pages/cedaw.aspx). Naciones Unidas

1980. [II Conferencia Mundial sobre la Mujer](http://www.un.org/womenwatch/daw/beijing/copenhagen.html). Copenhague

1985[. III Conferencia Mundial sobre la Mujer](http://www.un.org/womenwatch/daw/beijing/nairobi.html). Nairobi

1985. [Consejo Nacional de Derechos de la Mujer](../../../../../../AppData/Local/Microsoft/Windows/INetCache/Content.Outlook/QW49MM84/3ª%20Conferencia%20Nacional%20de%20Políticas%20para%20la%20Mujer%20(1ª%20CNPM),). Brasil

**1987-1996**🡪 1989. [Convención sobre los derechos del niño](https://www.unicef.es/causas/derechos-ninos/convencion-derechos-ninos). Naciones Unidas

1990. [National Center for Fathering](http://fathers.com/about-ncf/our-history/). Norte América 🡪 [Tato.net](http://tato.net/), Poland; [Faithful Fathering Initiative](https://faithfulfathering.org/), Texas; [Centre for Fathering](http://fathers.com.sg/), Singapore; [The Father’s Cry](http://www.thefatherscry.org/), Africa and U.S

1992. [Conferencia sobre Medioambiente y Desarrollo](http://www.un.org/spanish/esa/sustdev/documents/declaracionrio.htm). Río de Janeiro

1992. [Recomendaciones sobre cuidado infantil y promoción de medidas para que hombres asuman responsabilidades familiares, OJ [1992] L123/16](https://eur-lex.europa.eu/legal-content/EN/TXT/?uri=CELEX%3A31992H0241). Comisión Europea

1993. [Conferencia Mundial sobre Derechos Humanos](https://www.ohchr.org/sp/newsevents/ohchr20/pages/wchr.aspx). Viena

1994. [Conferencia Mundial sobre Población y Desarrollo](http://www.un.org/es/development/devagenda/population.shtml). El Cairo

1994. [Convención de Belém do Pará](http://www.oas.org/juridico/spanish/tratados/a-61.html) (Convención para prevenir, sancionar y erradicar la violencia contra la mujer). Brasil

1995. [Cumbre de Desarrollo Social](http://www.un.org/documents/ga/conf166/aconf166-9sp.htm). Copenhague

1995. [IV Conferencia Mundial sobre la Mujer](http://www.un.org/womenwatch/daw/beijing/fwcwn.html). Beijing

1996. [Resolución sobre la necesidad de compartir el trabajo no pagado y responsabilidades familiares. OJ [1996] L145/04.](https://eur-lex.europa.eu/legal-content/EN/ALL/?uri=CELEX%3A31996L0034) Comisión Europea

**1997-2006**🡪 2000. [Resolución 1325 del Consejo de Seguridad sobre Mujeres, Paz y Seguridad](https://www.google.com/url?sa=t&rct=j&q=&esrc=s&source=web&cd=1&ved=2ahUKEwiU7sjHlKDhAhUHgM4BHdaODwkQFjAAegQIAhAC&url=http%3A%2F%2Fwww.un.org%2Fwomenwatch%2Fods%2FS-RES-1325%25282000%2529-S.pdf&usg=AOvVaw3fYFtoAjeMlIgovFn0PNbG). Naciones Unidas

2000. [Resolución sobre la participación equilibrada de hombres y mujeres en la familia y el trabajo diario. OJ [2000] C218/5](https://eur-lex.europa.eu/legal-content/RO/TXT/?uri=OJ:C:2000:218:TOC). Comisión Europea

2000. [Resolución nº 288 sobre la igualdad de derechos entre hombres y mujeres](https://conf-dts1.unog.ch/1%20SPA/Tradutek/Derechos_hum_Base/CCPR/00_2_obs_grales_Cte%20DerHum%20%5BCCPR%5D.html). Comité de Derechos Humanos

2004. [1ª Conferencia Nacional de Políticas para la Mujer](https://www.google.com/url?sa=t&rct=j&q=&esrc=s&source=web&cd=16&ved=2ahUKEwjlu8-2iqDhAhVK1hoKHS_WD9EQFjAPegQIBRAC&url=http%3A%2F%2Fwww.onumulheres.org.br%2Fwp-content%2Fuploads%2F2015%2F03%2FInforme_Brasil_Beijing_20.pdf&usg=AOvVaw0b3JV25hY-jMu3ExH-vhEu). Brasil

2004. [MenEngage Alliance](http://menengage.org/). Alianza de ONG y agencias a ONU, para involucrar a hombres y niños en alcanzar la igualdad de género, promover la salud, y reducir la violencia:

[Advocates for Youth](http://www.advocatesforyouth.org/), [African Men for Sexual Health and Rights](http://www.amsher.org/), [Athena Network](http://www.athenanetwork.org/), [Breakthrough](http://us.breakthrough.tv/), [CARE](http://www.care.org/), [CARiMAN_The Caribbean Male Action Network](https://www.facebook.com/pg/CariMAN.org/about/?ref=page_internal), [Center for Health and Social Justice](http://www.chsj.org/), [Cultura y Salud](http://www.culturasalud.cl/), [EngenderHealth](https://www.engenderhealth.org/index-main.php), [Gender Violence Institute Minnesota](http://genderviolenceinstitute.org/), [Family Violence Prevention Fund](https://changingthepresent.org/collections/family-violence-prevention-fund), [International Center for Research on Women](https://www.icrw.org/about/), [International Planned Parenthood Federation](https://www.ippf.org/), [Men for Gender Equality –Sweden](http://www.mfj.se/), [Men Resources International](https://www.who.int/violenceprevention/about/participants/mri/en/), [Promundo](http://promundoglobal.org/), [Puntos de Encuentro](http://puntos-encuentro.blogspot.com/), [Save the Children](https://www.savethechildren.net/), [Sonke Gender Justice](http://www.genderjustice.org.za/) (Africa del Sur, 2006) [White Ribbon Campaign](http://www.whiteribbon.ca/), [Women’s International League for Peace and Freedom](http://wilpf.org/)

2005. [Beijing + 10](http://www.un.org/spanish/documents/instruments/docs_sp.asp). Nueva York

2006. [Resolución sobre igualdad de oportunidades y tratamiento de hombres y mujeres en material de empleo, OJ [2006] L/204](https://eur-lex.europa.eu/legal-content/EN/TXT/?uri=celex%3A32006L0054). Parlamento Europeo

**2007-2016**🡪 2007. [2ª Conferencia Nacional de Políticas para la Mujer](https://www.google.com/url?sa=t&rct=j&q=&esrc=s&source=web&cd=16&ved=2ahUKEwjlu8-2iqDhAhVK1hoKHS_WD9EQFjAPegQIBRAC&url=http%3A%2F%2Fwww.onumulheres.org.br%2Fwp-content%2Fuploads%2F2015%2F03%2FInforme_Brasil_Beijing_20.pdf&usg=AOvVaw0b3JV25hY-jMu3ExH-vhEu). Brasil

2008. [Work-Life Balance Package](https://www.google.com/url?sa=t&rct=j&q=&esrc=s&source=web&cd=1&ved=2ahUKEwiJ24Prl6DhAhWwx4UKHX0DB3IQFjAAegQIBRAC&url=https%3A%2F%2Feur-lex.europa.eu%2FLexUriServ%2FLexUriServ.do%3Furi%3DCOM%3A2008%3A0635%3AFIN%3Aen%3APDF&usg=AOvVaw1BLEq0dCUf7HtaI079An3k). Comisión Europea

2009. [Resolución sobre la igualdad de género como eje del trabajo decente](https://www.google.com/url?sa=t&rct=j&q=&esrc=s&source=web&cd=1&ved=2ahUKEwizv-SQmKDhAhUIWhoKHa_IDCcQFjAAegQIBhAC&url=http%3A%2F%2Fwww.ilo.org%2Fwcmsp5%2Fgroups%2Fpublic%2F%40dgreports%2F%40gender%2Fdocuments%2Fmeetingdocument%2Fwcms_115406.pdf&usg=AOvVaw2vrjeDxTuCd-FIZE3VLRaS). Conferencia Internacional del Trabajo

2009. [Declaración de Rio de Janeiro. Simposio Global Involucrando a Hombres y Niños en la Equidad de Género](http://www.eme.cl/declaracion-de-rio-de-janeiro/). Rio de Janeiro

2010. [Beijing + 15](http://www.un.org/womenwatch/daw/beijing15/). Nueva York

2011. [Estrategia para la Igualdad entre mujeres y hombres (2010-15)](https://publications.europa.eu/en/publication-detail/-/publication/c58de824-e42a-48ce-8d36-a16f30ef701b/language-en). Comisión Europea

2011. [Mencare. Campaña internacional para promover la participación de los hombres en su paternidad y como cuidadores](https://men-care.org/). Promundo (Brasil coordina América Latina)

2011. [3ª Conferencia Nacional de Políticas para la Mujer](https://www.google.com/url?sa=t&rct=j&q=&esrc=s&source=web&cd=16&ved=2ahUKEwjlu8-2iqDhAhVK1hoKHS_WD9EQFjAPegQIBRAC&url=http%3A%2F%2Fwww.onumulheres.org.br%2Fwp-content%2Fuploads%2F2015%2F03%2FInforme_Brasil_Beijing_20.pdf&usg=AOvVaw0b3JV25hY-jMu3ExH-vhEu). Brasil

2014. [Campaña HeforShe](https://www.heforshe.org/es). Naciones Unidas

2015. [Beijing + 20](http://beijing20.unwomen.org/es/about). Nueva York
